# Supplementary material for: Obesity and Cardiac Conduction Block Disease in China
Source: PubMed Central journal article supplement (PMC10644217; doi:10.1001/jamanetworkopen.2023.42831), 2023-11-13
Supplement: jamanetwopen-e2342831-s001.pdf [file jamanetwopen-e2342831-s001.pdf]

## Supplemental Online Content

Liu P, Wang Y, Zhang X, et al. Obesity and cardiac conduction block disease in China. *JAMA Netw Open*. 2023;6(11):e2342831. doi:10.1001/jamanetworkopen.2023.42831

**eTable 1.** Definitions of Cardiac Conduction Block Diseases

**eTable 2.** Association Between Body Mass Index and Cardiac Conduction Block Subtypes

**eTable 3.** Association Between Body Mass Index and Cardiac Conduction Block Using Time-Dependent Cox Proportional Hazards Model

**eTable 4.** Association Between Body Mass Index and Cardiac Conduction Block, Sensitivity Analyses

**eTable 5.** Association Between Body Mass Index and Cardiac Conduction Block Using Fine-Gray Model

**eFigure 1.** Cumulative Incidences for Cardiac Conduction Block

**eFigure 2.** Dose-Response Association Between Body Mass Index and Cardiac Conduction Block

**eMethods.** Definitions

This supplemental material has been provided by the authors to give readers additional information about their work.

**eTable 1.** Definitions of the different cardiac conduction block diseases

|                                      |                                                                                                                                                                                                                                                                                             |
|--------------------------------------|---------------------------------------------------------------------------------------------------------------------------------------------------------------------------------------------------------------------------------------------------------------------------------------------|
| Atrioventricular block               |                                                                                                                                                                                                                                                                                             |
| First-degree atrioventricular block  | P waves associated with 1:1 atrioventricular conduction and a PR interval >200 ms (this is more accurately defined as atrioventricular delay because no P waves are blocked)                                                                                                                |
| Second-degree atrioventricular block | P waves with a constant rate (<100 bpm) where atrioventricular conduction is present but not 1:1                                                                                                                                                                                            |
|                                      | Mobitz type I: P waves with a constant rate (<100 bpm) with a periodic single nonconducted P wave associated with P waves before and after the nonconducted P wave with inconstant PR intervals                                                                                             |
|                                      | Mobitz type II is characterized by fixed PR intervals before and after blocked beats and is usually associated with a wide QRS complex                                                                                                                                                      |
| Third-degree atrioventricular block  | No evidence of atrioventricular conduction                                                                                                                                                                                                                                                  |
| Right BBB (RBBB)                     |                                                                                                                                                                                                                                                                                             |
| Complete RBBB                        | 1. QRS duration of 120 ms or longer in the presence of normal sinus rhythm or supraventricular rhythm;<br>2. R or rSR' complex in lead V1;<br>3. rS in leads V5, V6, I, or aVL with prolonged shallow S wave.                                                                               |
| Incomplete RBBB                      | Same QRS morphology criteria as complete RBBB but with a QRS duration between 110 and 119 ms                                                                                                                                                                                                |
| Complete LBBB                        | 1. QRS duration of 120 ms or longer in the presence of normal sinus rhythm or supraventricular rhythm (not atrial fibrillation);<br>2. QS or rS complex in lead V1;<br>3. broad R waves in leads I, aVL, V5-V6 (or an rS pattern in V5-V6);<br>4. absence of Q waves in leads V5, V6, or I. |
| Incomplete LBBB                      | 1. QRS duration between 110 and 119 ms in adults;<br>2. Presence of left ventricular hypertrophy pattern;<br>3. R peak time >60 ms in leads V4, V5, and V6;<br>4. Absence of Q wave in leads I, V5, and V6                                                                                  |
| Left anterior fascicular block       | 1. QRS duration <120 ms;<br>2. Frontal plane axis between $-45^\circ$ and $-90^\circ$ ;<br>3. R-peak time in lead aVL of $\geq 45$ ms;<br>4. qR (small r, tall R) pattern in lead aVL;<br>5. rS pattern (small r, deep S) in leads II, III, and aVF                                         |
| Left posterior fascicular block      | 1. QRS duration <120 ms;<br>2. Frontal plane axis between $90^\circ$ and $180^\circ$ in adults;<br>3. rS (small r, deep S) pattern in leads I and aVL;<br>4. qR (small q, tall R) pattern in leads III and aVF                                                                              |

**eTable 2.** Hazard ratio and 95% confidence interval for the association between different body mass index (BMI) groups and CCB

|                                        | BMI 18.5 to <24<br>(n=33259) | BMI 24 to <28<br>(n=37069) | BMI ≥28<br>(n=16307) | Per 5-unit<br>increase |
|----------------------------------------|------------------------------|----------------------------|----------------------|------------------------|
| <b>Complete RBBB</b>                   |                              |                            |                      |                        |
| Case                                   | 206                          | 251                        | 111                  |                        |
| Incidence rate, No./10<br>000 person-y | 5.80                         | 6.37                       | 6.41                 |                        |
| Model1                                 | Ref                          | 1.03 (0.86-1.24)           | 1.10 (0.87-1.38)     | 1.02 (0.90-1.16)       |
| Model2                                 | Ref                          | 1.04 (0.86-1.25)           | 1.11 (0.87-1.40)     | 1.03 (0.90-1.17)       |
| Model3                                 | Ref                          | 1.04 (0.86-1.25)           | 1.11 (0.80-1.42)     | 1.03 (0.90-1.17)       |
| Model4                                 | Ref                          | 1.03 (0.86-1.25)           | 1.09 (0.86-1.39)     | 1.02 (0.90-1.16)       |
| <b>Incomplete RBBB</b>                 |                              |                            |                      |                        |
| Case                                   | 319                          | 366                        | 165                  |                        |
| Incidence rate, No./10<br>000 person-y | 9.00                         | 9.30                       | 9.54                 |                        |
| Model1                                 | Ref                          | 0.98 (0.84-1.13)           | 1.04 (0.86-1.25)     | 1.06 (0.96-1.17)       |
| Model2                                 | Ref                          | 1.03 (0.89-1.20)           | 1.16 (0.96-1.40)     | 1.13 (1.02-1.25)       |
| Model3                                 | Ref                          | 1.03 (0.89-1.20)           | 1.15 (0.95-1.40)     | 1.13 (1.02-1.25)       |
| Model4                                 | Ref                          | 1.03 (0.88-1.20)           | 1.15 (0.95-1.40)     | 1.13 (1.02-1.25)       |
| <b>LAFB</b>                            |                              |                            |                      |                        |
| Case                                   | 194                          | 241                        | 135                  |                        |
| Incidence rate, No./10<br>000 person-y | 5.47                         | 6.11                       | 7.80                 |                        |
| Model1                                 | Ref                          | 1.04 (0.86-1.26)           | 1.39 (1.12-1.73)     | 1.24 (1.10-1.40)       |
| Model2                                 | Ref                          | 0.99 (0.82-1.20)           | 1.26 (1.01-1.58)     | 1.17 (1.03-1.33)       |
| Model3                                 | Ref                          | 0.99 (0.82-1.20)           | 1.25 (1.00-1.57)     | 1.17 (1.03-1.33)       |
| Model4                                 | Ref                          | 1.00 (0.83-1.21)           | 1.29 (1.03-1.62)     | 1.19 (1.05-1.35)       |
| <b>LPFB</b>                            |                              |                            |                      |                        |
| Case                                   | 6                            | 7                          | 0                    |                        |
| Incidence rate, No./10<br>000 person-y | 0.17                         | 0.18                       | 0.00                 |                        |
| <b>2nd1AVB</b>                         |                              |                            |                      |                        |
| Case                                   | 5                            | 3                          | 1                    |                        |
| Incidence rate, No./10<br>000 person-y | 0.14                         | 0.08                       | 0.06                 |                        |
| <b>Complete LBBB</b>                   |                              |                            |                      |                        |
| Case                                   | 12                           | 18                         | 10                   |                        |
| Incidence rate, No./10<br>000 person-y | 0.34                         | 0.46                       | 0.58                 |                        |
| Model1                                 | Ref                          | 1.31 (0.63-2.71)           | 1.72 (0.74-3.98)     | 1.33 (0.86-2.06)       |
| Model2                                 | Ref                          | 1.37 (0.66-2.87)           | 1.91 (0.81-4.51)     | 1.42 (0.91-2.23)       |
| Model3                                 | Ref                          | 1.37 (0.66-2.86)           | 1.90 (0.81-4.50)     | 1.41 (0.90-2.22)       |
| Model4                                 | Ref                          | 1.30 (0.62-2.73)           | 1.72 (0.72-4.10)     | 1.34 (0.84-2.13)       |
| <b>Incomplete LBBB</b>                 |                              |                            |                      |                        |
| Case                                   | 8                            | 13                         | 6                    |                        |

| Incidence rate, No./10<br>000 person-y | 0.22 | 0.33             | 0.35             |                  |
|----------------------------------------|------|------------------|------------------|------------------|
| Model1                                 | Ref  | 1.36 (0.56-3.28) | 1.52 (0.53-4.38) | 1.49 (0.88-2.51) |
| Model2                                 | Ref  | 1.33 (0.55-3.25) | 1.46 (0.49-4.30) | 1.44 (0.84-2.46) |
| Model3                                 | Ref  | 1.32 (0.54-3.23) | 1.42 (0.48-4.19) | 1.43 (0.83-2.44) |
| Model4                                 | Ref  | 1.25 (0.51-3.07) | 1.28 (0.43-3.82) | 1.37 (0.79-2.38) |

Abbreviations: Complete RBBB, complete right bundle branch block; Incomplete RBBB, incomplete right bundle branch block; Complete LBBB, complete left bundle branch block; Incomplete LBBB, incomplete left bundle branch block; LAFB, left anterior fascicular block; LPFB, left posterior fascicular block; 2nd1AVB, second-degree type 1 atrioventricular block.

Model 1 adjusted for age and sex.

Model 2 adjusted for age, sex, smoking, drinking, high salt intake, physical activity, high-sensitivity C reactive protein level, low-density lipoprotein cholesterol level, high-density lipoprotein cholesterol level, estimated glomerular filtration rate level, hypertension, and diabetes.

Model 3 adjusted for all the variables in model 2 and myocardial infarction during follow-up and heart failure during follow-up.

Model 4 adjusted for all the variables in model 3 and antidiabetic treatment, antihypertensive treatment and lipid-lowering drug.

**eTable 3.** Hazard ratio and 95% confidence interval for the association between different body mass index (BMI) groups and CCB using time-dependent cox proportional hazards model

|        | BMI 18.5 to <24<br>(n=33259) | BMI 24 to <28<br>(n=37069) | BMI≥28<br>(n=16307) | Per 5-unit<br>increase |
|--------|------------------------------|----------------------------|---------------------|------------------------|
| CCB    |                              |                            |                     |                        |
| Model1 | Ref                          | 1.14 (1.06-1.23)           | 1.34 (1.23-1.47)    | 1.14 (1.08-1.19)       |
| Model2 | Ref                          | 1.13 (1.05-1.22)           | 1.31 (1.20-1.43)    | 1.13 (1.08-1.18)       |
| Model3 | Ref                          | 1.14 (1.05-1.22)           | 1.33 (1.21-1.45)    | 1.14 (1.08-1.19)       |
| Model4 | Ref                          | 1.13 (1.05-1.22)           | 1.33 (1.21-1.45)    | 1.14 (1.08-1.19)       |

Abbreviations: BMI, body mass index (calculated as weight in kilograms divided by height in 2 meters squared); CCB, cardiac conduction block.

Model 1 adjusted for age and sex.

Model 2 adjusted for age, sex, smoking, drinking, high salt intake, physical activity, high-sensitivity C reactive protein level, low-density lipoprotein cholesterol level, high-density lipoprotein cholesterol level, estimated glomerular filtration rate level, hypertension, and diabetes.

Model 3 adjusted for all the variables in model 2 and myocardial infarction during follow-up, heart failure during follow-up.

Model 4 adjusted for all the variables in model 3 and antidiabetic treatment, antihypertensive treatment, lipid-lowering drug.

**eTable 4.** Hazard ratio and 95% confidence interval for the association between different body mass index (BMI) groups and CCB, sensitivity analyses

|                                                                                                 | BMI 18.5 to <24 | BMI 24 to <28    | BMI ≥28          |
|-------------------------------------------------------------------------------------------------|-----------------|------------------|------------------|
| <b>CCB</b>                                                                                      |                 |                  |                  |
| Excluded new-onset cardiac conduction block cases within the first 2 years of follow-up (n=861) |                 |                  |                  |
| Model1                                                                                          | Ref.            | 1.05 (0.93-1.19) | 1.25 (1.07-1.47) |
| Model2                                                                                          | Ref.            | 1.04 (0.92-1.18) | 1.23 (1.06-1.44) |
| Model3                                                                                          | Ref.            | 1.04 (0.92-1.17) | 1.24 (1.06-1.44) |
| Excluded new-onset myocardial infarction during follow-up (n=1121)                              |                 |                  |                  |
| Model1                                                                                          | Ref.            | 1.07 (0.95-1.20) | 1.30 (1.13-1.50) |
| Model2                                                                                          | Ref.            | 1.05 (0.92-1.19) | 1.26 (1.08-1.48) |
| Model3 <sup>a</sup>                                                                             | Ref.            | 1.04 (0.92-1.17) | 1.24 (1.07-1.44) |
| Excluded new-onset heart failure during follow-up (n=906)                                       |                 |                  |                  |
| Model1                                                                                          | Ref.            | 1.05 (0.93-1.18) | 1.27 (1.10-1.47) |
| Model2                                                                                          | Ref.            | 1.04 (0.92-1.18) | 1.26 (1.08-1.46) |
| Model3 <sup>b</sup>                                                                             | Ref.            | 1.02 (0.91-1.16) | 1.21 (1.04-1.41) |

Abbreviations: BMI, body mass index (calculated as weight in kilograms divided by height in 2 meters squared); CCB, cardiac conduction block.

Model 1 adjusted for age and sex.

Model 2 adjusted for age, sex, smoking, drinking, high salt intake, physical activity, high-sensitivity C reactive protein level, low-density lipoprotein cholesterol level, high-density lipoprotein cholesterol level, estimated glomerular filtration rate level, hypertension, diabetes.

Model 3 adjusted for all the variables in model 2 and antidiabetic treatment, antihypertensive treatment, lipid-lowering drug.

Model 3<sup>a</sup> adjusted for all the variables in model 2 and heart failure during follow-up, antidiabetic treatment, antihypertensive treatment, lipid-lowering drug.

Model 3<sup>b</sup> adjusted for all the variables in model 2 and myocardial infarction during follow-up, antidiabetic treatment, antihypertensive treatment, lipid-lowering drug.

**eTable 5.** Hazard ratio and 95% confidence interval for the association between different body mass index (BMI) groups and CCB using Fine-Gray model

|         | BMI 18.5 to <24<br>(n=33259) | BMI 24 to <28<br>(n=37069) | BMI ≥28<br>(n=16307) |
|---------|------------------------------|----------------------------|----------------------|
| CCB     |                              |                            |                      |
| Model 1 | Ref                          | 1.06 (0.94-1.20)           | 1.26 (1.08-1.47)     |
| Model 2 | Ref                          | 1.05 (0.92-1.19)           | 1.23 (1.05-1.43)     |
| Model 3 | Ref                          | 1.05 (0.92-1.19)           | 1.22 (1.05-1.43)     |
| Model 4 | Ref                          | 1.05 (0.92-1.19)           | 1.23 (1.05-1.43)     |

Abbreviations: BMI, body mass index (calculated as weight in kilograms divided by height in 2 meters squared); CCB, cardiac conduction block.

Model 1 adjusted for age and sex.

Model 2 adjusted for age, sex, smoking, drinking, high salt intake, physical activity, high-sensitivity C reactive protein level, low-density lipoprotein cholesterol level, high-density lipoprotein cholesterol level, estimated glomerular filtration rate level, hypertension, and diabetes.

Model 3 adjusted for all the variables in model 2 and myocardial infarction during follow-up, heart failure during follow-up.

Model 4 adjusted for all the variables in model 3 and antidiabetic treatment, antihypertensive treatment, lipid-lowering drug.

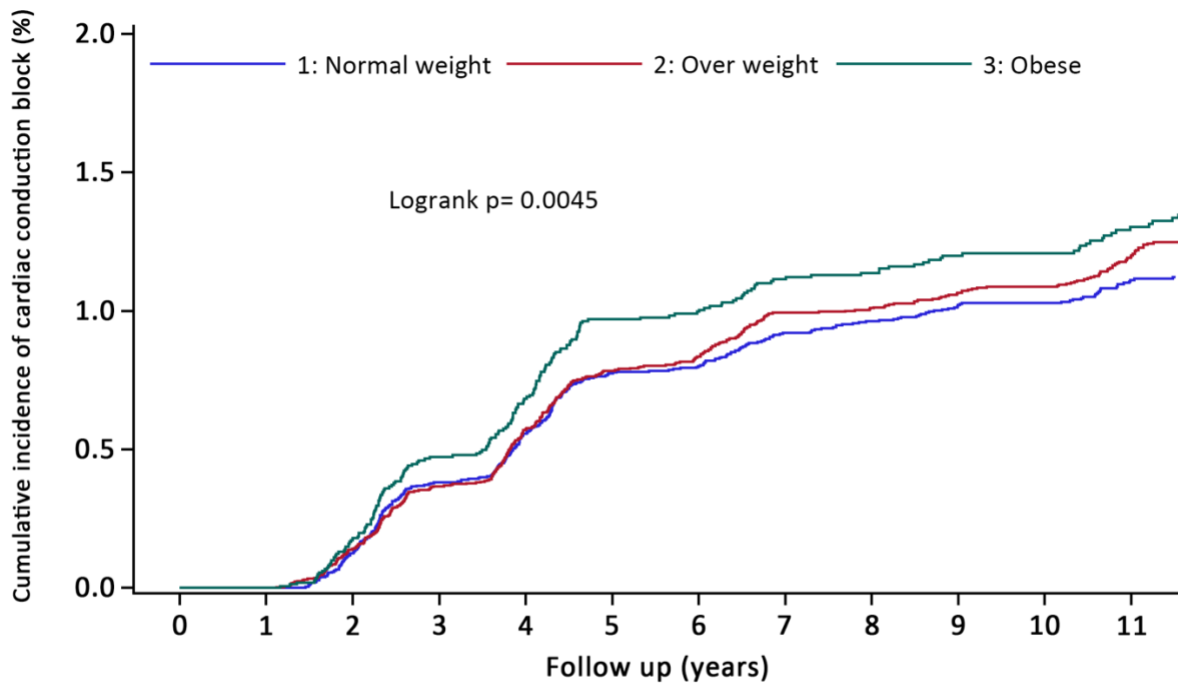

|   |       |       |       |       |       |       |       |       |       |       |       |       |
|---|-------|-------|-------|-------|-------|-------|-------|-------|-------|-------|-------|-------|
| 1 | 33259 | 33257 | 32913 | 32179 | 31525 | 30534 | 29849 | 28027 | 26951 | 24894 | 23816 | 19689 |
| 2 | 37069 | 37066 | 36668 | 35882 | 35087 | 33992 | 33275 | 31228 | 29972 | 27584 | 26337 | 21279 |
| 3 | 16307 | 16306 | 16119 | 15747 | 15439 | 14937 | 14623 | 13712 | 13120 | 12130 | 11575 | 9316  |

**eFigure 1:** Cumulative incidences for CCB. CCB is defined as the occurrence of any of the following: High-grade atrioventricular block, complete right bundle branch block, complete left bundle branch block, left anterior fascicular block, or left posterior fascicular block.



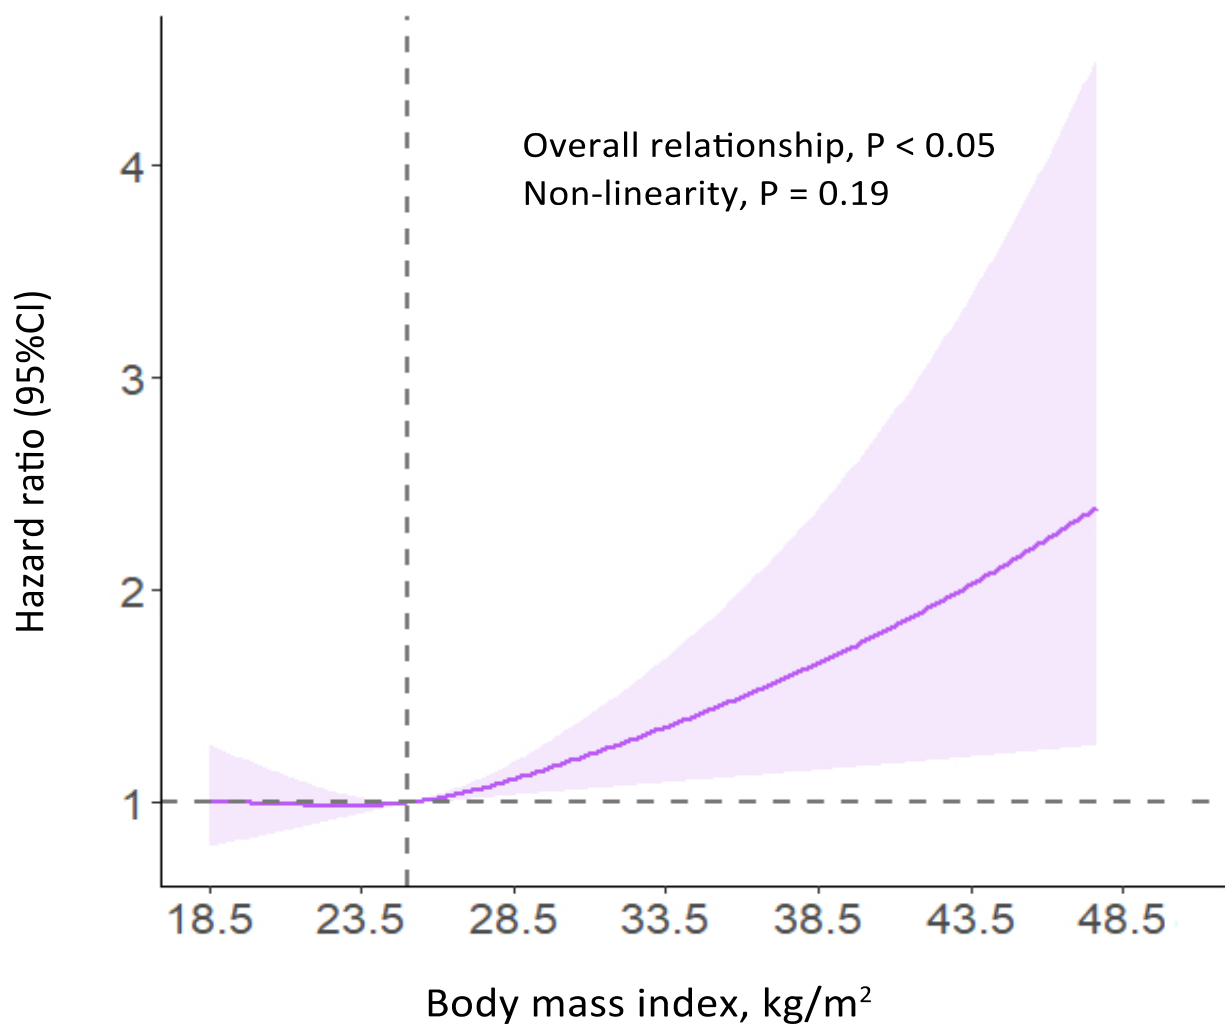

**eFigure 2.** Dose-response Relationship between BMI and CCB. Restricted cubic splines were constructed with three knots located at the 25th, 50th, and 75th percentiles of BMI. adjusted for age, sex, smoking, drinking, high salt intake, physical activity, high-sensitivity C reactive protein level, low-density lipoprotein cholesterol level, high-density lipoprotein cholesterol level, estimated glomerular filtration rate level, hypertension, diabetes, myocardial infarction during follow-up, heart failure during follow-up, antidiabetic treatment, antihypertensive treatment, and lipid-lowering drug.

## **eMethod 1.** Definitions

Participants who developed myocardial infarction or heart failure during follow-up were identified and recorded this using the International Classification of Diseases codes (ICD-10) by trained personnel. Hypertension was defined as having a systolic blood pressure (SBP)  $\geq 140$  mmHg/diastolic blood pressure (DBP)  $\geq 90$  mmHg, or the current use of antihypertensive drugs. Diabetes was defined using a fasting blood glucose (FBG)  $\geq 7.0$  mmol/L or the use of antidiabetic drugs. Drinking was defined using a mean daily intake of 100 ml liquor (alcohol content  $\geq 50\%$ ) for at least 1 year. Smoking was defined as smoking at least 1 cigarette per day during the preceding year. Physical exercise was defined as the taking of exercise  $\geq 3$  times per week for  $\geq 30$  min on each occasion. High salt intake was defined as the consumption of  $> 6$  g salt/day.
