# Supplementary material for: Obesity and Cardiac Conduction Block Disease in China
Source: PubMed Central journal article supplement (PMC10644217; doi:10.1001/jamanetworkopen.2023.42831), 2023-11-13
Supplement: jamanetwopen-e2342831-s002.pdf [file jamanetwopen-e2342831-s002.pdf]

## **Data Sharing Statement**

Liu. Obesity and Cardiac Conduction Block Disease in China. *JAMA Netw Open*. Published online November 13, 2023. doi:10.1001/jamanetworkopen.2023.42831

### **Data**

**Data available:** No
